# Supplementary material for: The Determination of Polycyclic Aromatic Hydrocarbons (PAHs) with HPLC-DAD-FLD and GC-MS Techniques in the Dissolved and Particulate Phase of Road-Tunnel Wash Water: A Case Study for Cross-Array Comparisons and Applications
Source: MDPI journal article supplement (doi:10.3390/toxics10070399), 2022-07-19
Supplement: s1 [file s1]

# Supplementary Materials: The Determination of Polycyclic Aromatic Hydrocarbons (PAHs) with HPLC-DAD-FLD and GC-MS Techniques in the Dissolved and Particulate Phase of Road-Tunnel Wash Water: A Case Study for Cross-Array Comparisons and Applications

Hanne Vistnes, Nadine A. Sossalla, Anna Røsvik, Susana V. Gonzalez, Junjie Zhang, Thomas Meyn and Alexandros G. Asimakopoulos

**Table S1.** Information concerning location in Norway, approximate length of the tunnel, average annual daily traffic, and speed limits in the five tunnels where the tunnel wash water samples were collected. AADT = annual average daily traffic.

| Tunnel           | Location                     | Length (m) | AADT (vehicle/day) | Speed limit (km/h) |
|------------------|------------------------------|------------|--------------------|--------------------|
| Bjørnegård (BT)  | European Road 16, Bærum      | 2,200      | 30,000             | 80                 |
| Granfoss (Gra)   | State Highway 150, Oslo      | 2,350      | 31,000             | 60                 |
| Smestad (Sme)    | State Highway 150, Oslo      | 494        | 23,000             | 60                 |
| Grillstad (Gri)  | European Road 6, Trondheim   | 748        | 22,000             | 80                 |
| Strindheim (Str) | State Highway 706, Trondheim | 2,597      | 21,120             | 60                 |

**Table S2.** Values for different run parameters used in the accelerated solvent extraction (ASE) of PAHs in particulate phase samples.

| System Information      | Value     |
|-------------------------|-----------|
| Pressure                | 1,500 psi |
| Oven Temperature        | 100 °C    |
| Cell Size               | 10 mL     |
| Static Extraction Time  | 5 min     |
| Number of Static Cycles | 2         |
| Rinse Volume            | 6 mL      |
| Nitrogen Purge          | 90 sec    |
| Extraction Time         | 19 min    |

**Table S3.** Applied temperature gradient for GC-MS analysis.

| Time (min) | Temperature (°C) | Temperature increase rate (°C/min) |
|------------|------------------|------------------------------------|
| 0          | 50               |                                    |
| 2          | 50               |                                    |
| 10         | 250              | 25                                 |
| 11         | 250              |                                    |
| 23         | 286              | 3                                  |
| 26         | 286              |                                    |
| 28.75      | 308              | 8                                  |
| 29.75      | 308              |                                    |
| 31.75      | 310              | 1                                  |
| 34.75      | 310              |                                    |

**Table S4.** Settings for the mass spectrometry detector for PAH analysis

| Time Interval<br>(min) | m/z | PAH Compound |
|------------------------|-----|--------------|
| 0.00                   | 128 | NAP          |
| 8.25                   | 172 | F-Bisphenyl  |
| 9.25                   | 152 | ACY          |
|                        | 154 | ACE          |
| 9.80                   | 166 | FLU          |
| 10.80                  | 178 | PHE, ANT     |
|                        | 196 | F-PHE        |
| 13.00                  | 202 | FLT, PYR     |
| 17.00                  | 246 | F-CHR        |
| 17.50                  | 228 | BaA, CHR     |
| 19.00                  | 252 | BkF, BaP     |
| 26.00                  | 276 | BgP, IND     |
|                        | 278 | DBA          |

**Table S5.** HPLC-DAD-FLD conditions used during solvent gradient separation of 16 PAHs.

| Time (min) | v/v % Water | v/v % Acetonitrile |
|------------|-------------|--------------------|
| 0.00       | 60.0        | 40.0               |
| 0.50       | 60.0        | 40.0               |
| 8.00       | 20.0        | 80.0               |
| 11.0       | 20.0        | 80.0               |
| 13.0       | 0.00        | 100                |
| 18.0       | 0.00        | 100                |
| 18.1       | 60.0        | 40.0               |
| 22.5       | 60.0        | 40.0               |

**Table S6.** Calibration curve correlation coefficients for different batch analyses with GC-MS and HPLC-DAD-FLD. n.d. = not detected, n.a. = not analyzed.

|     | GC-MS  |        | HPLC-DAD-FLD |        |        |
|-----|--------|--------|--------------|--------|--------|
|     | Run 1  | Run 2  | Run 1        | Run 2  | Run 3  |
| NAP | 0.9994 | 0.998  | 0.9999       | 0.9999 | 0.9999 |
| ACY | 0.994  | 0.9991 | 0.9999       | 0.9999 | 0.9999 |
| ACE | 0.993  | 0.997  | 0.9993       | 0.9993 | 0.9992 |
| FLU | 0.9992 | 0.9998 | n.a.         | n.a.   | n.a.   |
| PHE | 0.9999 | 0.9996 | 0.9992       | 0.9998 | 0.9999 |
| ANT | 0.9997 | 0.9993 | 0.9999       | 1.00   | 0.998  |
| FLT | 0.991  | 0.9990 | 1.00         | 1.00   | 1.00   |
| PYR | 0.9999 | 0.9993 | 0.9999       | 0.9999 | 0.9999 |
| BaA | 0.9994 | 0.9979 | 0.9999       | 0.9999 | 1.00   |
| CHR | 0.9994 | 0.998  | 0.9999       | 0.9999 | 0.9999 |
| BbF | 0.996  | 0.997  | 0.9999       | 1.00   | 0.9999 |
| BkF | 0.98   | 0.9995 | 0.9998       | 0.9999 | 0.9998 |
| BaP | 0.997  | 0.997  | n.d.         | n.d.   | n.d.   |
| IND | 0.9997 | 0.997  | 0.997        | 0.993  | n.d.   |
| DBA | 0.9991 | 0.998  | 0.9997       | 0.9998 | 0.98   |
| BgP | 0.997  | 0.995  | 0.9999       | 1.00   | 0.9994 |

**Table S7.** Extraction method reproducibility data at a fortification amount of 100 µg/L (n = 4; performed with HPLD-FLD analysis). n.d. = not detected.

|       | RSD% |
|-------|------|
| NAP   | 0.36 |
| F-NAP | 0.58 |
| ACY   | 0.99 |
| ACE   | 0.46 |
| PHE   | 8.9  |
| ANT   | 22   |
| FLT   | 0.87 |
| PYR   | 3.0  |
| F-PYR | 1.0  |
| BaA   | 0.35 |
| CHR   | 0.38 |
| F-CHR | 0.93 |
| BpF   | 1.7  |
| BkF   | 0.88 |
| BaP   | 2.4  |
| DBA   | 74   |
| BgP   | 4.8  |
| IND   | n.d. |

**Table S8.** Relative standard deviations (RSD%) for the internal standards (IS): F-Bisphenyl, F-PHE, and F-CHR analyzed by GC-MS; DP = dissolved phase, PP = particulate phase.

|                            | F-Bisphenyl | F-PHE | F-CHR |
|----------------------------|-------------|-------|-------|
| <b>DF 100 ppb IS (n=9)</b> | 13          | 10    | 12    |
| <b>DF 50 ppb IS (n=6)</b>  | 36          | 9.3   | 11    |
| <b>PF 5 ppb (n=8)</b>      | 19          | 19    | 21    |
| <b>PF 10 ppb (n=4)</b>     | 20          | 20    | 20    |
| <b>PF 50 ppb (n=13)</b>    | 15          | 18    | 11    |

**Table S9.** Diagnostic ratios used for PAH compounds to indicate the sources of pollution. ANT = anthracene, PHE = phenanthrene, FLT = fluoranthene, PYR = pyrene, BaA = benzo(a)anthracene, and CHR = chrysene.

| Ratio         | Range      | Indicated source                                         | Ref. |
|---------------|------------|----------------------------------------------------------|------|
| ANT/(ANT+PHE) | 0 – 0.1    | Petrogenic/petroleum source                              | [1]  |
|               | 0.1 - 1    | Pyrogenic/combustion source                              | [1]  |
| FLT/(FLT+PYR) | 0 – 0.33   | Fossil fuels (not combusted)                             | [2]  |
|               | 0.33 – 0.5 | Low temperature process                                  | [2]  |
|               | 0.5 – 1    | High temperature process                                 | [2]  |
|               | 0 – 0.4    | Petroleum (not combusted)                                | [3]  |
|               | 0.4 – 0.5  | Liquid fossil fuel (car and crude oil) combustion        | [3]  |
|               | 0.5 - 1    | Grass, wood, and coal combustion                         | [3]  |
| BaA/(BaA+CHR) | 0 – 0.2    | Petroleum (not combusted)                                | [3]  |
|               | 0.2 – 0.35 | Petroleum (not combusted) or combustion (coal, gasoline) | [3]  |
|               | 0.35 - 1   | Combustion (wood, coal, diesel, gasoline)                | [3]  |
| IND/(IND+BGP) | 0 – 0.2    | Petroleum (not combusted)                                | [3]  |
|               | 0.2 – 0.5  | Liquid fossil fuel (car and crude oil) combustion        | [3]  |
|               | 0.5 - 1    | Grass, wood, and coal combustion                         | [3]  |

**Table S10.** Summary of which internal standard compound was used to determine each of the target analyte PAHs. n.a. = not analyzed.

| Compound | GC-MS method | HPLC-DAD-FLD method |
|----------|--------------|---------------------|
| NAP      | F-Biphenyl   | F-NAP               |
| ACY      | F-Biphenyl   | F-NAP               |
| ACE      | F-Biphenyl   | F-NAP               |
| FLU      | F-PHE        | n.a.                |
| PHE      | F-PHE        | F-NAP               |
| ANT      | F-PHE        | F-PYR               |
| FLT      | F-PHE        | F-PYR               |
| PYR      | F-PHE        | F-PYR               |
| BaA      | F-CHR        | F-CHR               |
| CHR      | F-CHR        | F-CHR               |
| BbF      | F-CHR        | F-CHR               |
| BkF      | F-CHR        | F-CHR               |
| BaP      | F-CHR        | F-CHR               |
| DBA      | F-CHR        | F-CHR               |
| BgP      | F-CHR        | F-CHR               |
| IND      | F-CHR        | F-CHR               |

**Table S11.** Summary of average recoveries, relative standard deviations (RSD) and p-value from two-sample t-test for dissolved phase recoveries. n.a. = not analyzed, n.d. = not detected.

|     | Our study (n=3) |      |  | Oleszczuk et al. (n=9) |     |        | Kootstra et al. (n=3) |     |        | Bruzzoniti et al. (n=6) |     |         |
|-----|-----------------|------|--|------------------------|-----|--------|-----------------------|-----|--------|-------------------------|-----|---------|
|     | Average         | RSD  |  | Average                | RSD | p-val. | Average               | RSD | p-val. | Average                 | RSD | p-val.  |
| NAP | 54              | 20   |  | 99                     | 20  | 0.0043 | 88                    | 20  | 0.046  | n.d.                    | -   | -       |
| ACY | 60              | 20   |  | 104                    | 20  | 0.0067 | 82                    | 20  | 0.134  | n.a.                    | -   |         |
| ACE | 51              | 20   |  | 64                     | 20  | 0.14   | 81                    | 20  | 0.053  | 21                      | 20  | 0.00033 |
| FLU | n.d.            | n.d. |  | 93                     | 20  | -      | 84                    | 20  | -      | 67                      | 20  | -       |
| PHE | 44              | 20   |  | 72                     | 20  | 0.011  | 83                    | 20  | 0.023  | 92                      | 20  | 0.0041  |
| ANT | 42              | 20   |  | 82                     | 20  | 0.0027 | 77                    | 20  | 0.026  | 81                      | 20  | 0.0065  |
| FLT | 47              | 20   |  | 81                     | 20  | 0.0070 | 71                    | 20  | 0.071  | 85                      | 20  | 0.010   |
| PYR | 46              | 20   |  | 90                     | 20  | 0.0026 | 69                    | 20  | 0.074  | 88                      | 20  | 0.0068  |
| BaA | 59              | 20   |  | 106                    | 20  | 0.0050 | 68                    | 20  | 0.44   | 84                      | 20  | 0.053   |
| CHR | 65              | 20   |  | 96                     | 20  | 0.028  | 75                    | 20  | 0.43   | 82                      | 20  | 0.16    |
| BbF | 68              | 20   |  | 91                     | 20  | 0.075  | 64                    | 20  | 0.73   | 82                      | 20  | 0.25    |
| BkF | 71              | 20   |  | 87                     | 20  | 0.18   | 66                    | 20  | 0.68   | 77                      | 20  | 0.59    |
| BaP | 68              | 20   |  | 77                     | 20  | 0.39   | 51                    | 20  | 0.16   | 74                      | 20  | 0.58    |
| DBA | n.d.            | n.d. |  | 72                     | 20  | -      | 64                    | 20  | -      | 70                      | 20  | -       |
| BgP | 79              | 20   |  | 69                     | 20  | 0.32   | 65                    | 20  | 0.30   | 74                      | 20  | 0.65    |
| IND | n.d.            | n.d. |  | 81                     | 20  | -      | 58                    | 20  | -      | 70                      | 20  | -       |

**Table S12.** Summary of average recoveries, relative standard deviations (RSD) and p-value from two-sample t-test for particulate phase recoveries. n.a. = not analyzed, n.d. = not detected.

| Our study (n=3) |      |      | Alexandrou et al. (n=5) |     |        | Wang et al. (n=3) |     |        |
|-----------------|------|------|-------------------------|-----|--------|-------------------|-----|--------|
|                 |      | RSD  | Average                 | RSD | p-val. | Average           | RSD | p-val. |
| NAP             | 57   | 20   | n.a.                    | -   | -      | 70                | 20  | 0.28   |
| ACY             | n.a. | n.a. | 92                      | 20  | -      | 85                | 20  | -      |
| ACE             | 73   | 20   | 83                      | 20  | 0.42   | 91                | 20  | 0.25   |
| FLU             | 78   | 20   | 89                      | 20  | 0.41   | 89                | 20  | 0.47   |
| PHE             | 82   | 20   | 94                      | 20  | 0.4    | 96                | 20  | 0.39   |
| ANT             | 83   | 20   | 85                      | 20  | 0.88   | 93                | 20  | 0.53   |
| FLT             | 87   | 20   | 90                      | 20  | 0.83   | 84                | 20  | 0.84   |
| PYR             | 88   | 20   | 90                      | 20  | 0.88   | 97                | 20  | 0.58   |
| BaA             | 91   | 20   | 97                      | 20  | 0.68   | 90                | 20  | 0.95   |
| CHR             | 91   | 20   | 99                      | 20  | 0.59   | 77                | 20  | 0.37   |
| BbF             | 91   | 20   | 102                     | 20  | 0.47   | 94                | 20  | 0.85   |
| BkF             | 91   | 20   | 109                     | 20  | 0.28   | 105               | 20  | 0.43   |
| BaP             | 92   | 20   | 96                      | 20  | 0.78   | 110               | 20  | 0.34   |
| DBA             | 88   | 20   | 105                     | 20  | 0.29   | 112               | 20  | 0.22   |
| BgP             | 92   | 20   | 107                     | 20  | 0.35   | 111               | 20  | 0.32   |
| IND             | 104  | 20   | 99                      | 20  | 0.75   | 73                | 20  | 0.10   |

**Table S13.** Limits of detection (LOD) and limits of quantification (LOQ) of the 16 PAH compounds. Analyzed with HPLC-FLD and GC-MS. No LOD or LOQ for benzo(a)pyrene (BaP) are included in the table for HPLC-FLD, since BaP and the internal standard 9-fluorobenzo(k)fluoranthene (F-BkF) overlapped in the retention time. For fluorene (FLU), it was not possible to find the LODs and LOQs for this compound in the HPLC-FLD analysis, due to a jump in the baseline noise. n.d. = not detected, n.a. = not analyzed.

|     | GC-MS         |               | HPLC-FLD      |               |
|-----|---------------|---------------|---------------|---------------|
|     | LOD<br>(µg/L) | LOQ<br>(µg/L) | LOD<br>(µg/L) | LOQ<br>(µg/L) |
| NAP | 0.0030        | 0.010         | 0.30          | 1.0           |
| ACY | 0.30          | 1.0           | 3.0           | 10            |
| ACE | 0.30          | 1.0           | 0.30          | 1.0           |
| FLU | 0.30          | 1.0           | n.a.          | n.a.          |
| PHE | 0.030         | 0.10          | 0.30          | 1.0           |
| ANT | 0.30          | 1.0           | 3.0           | 10            |
| FLT | 0.30          | 1.0           | 3.0           | 10            |
| PYR | 0.30          | 1.0           | 0.30          | 1.0           |
| BaA | 0.60          | 2.0           | 3.0           | 10            |
| CHR | 0.60          | 2.0           | 6.0           | 20            |
| BbF | 1.5           | 5.0           | 3.0           | 10            |
| BkF | 1.5           | 5.0           | 0.30          | 1.0           |
| BaP | 1.5           | 5.0           | n.d.          | n.d.          |
| DBA | 3.0           | 10            | 15            | 50            |
| BgP | 1.5           | 5.0           | 3.0           | 10            |
| IND | 3.0           | 10            | 30            | 100           |

**Table S14.** Detection rates (DR), median, mean, minimum (Min) and maximum (Max) of the total concentrations (µg/L) for the 16 polycyclic aromatic hydrocarbons (PAH) compounds in the tunnel wash water samples (n = 5 analyzed by the two different methods (Gas Chromatography Mass Spectrometry (GC-MS) and High-Performance Liquid Chromatography (HPLC-FLD)). n.d. = not detected.

|     | DR (%) |          | Median (µg/L) |          | Mean (µg/L) |          | Min (µg/L) |          | Max (µg/L) |          |
|-----|--------|----------|---------------|----------|-------------|----------|------------|----------|------------|----------|
|     | GC-MS  | HPLC-FLD | GC-MS         | HPLC-FLD | GC-MS       | HPLC-FLD | GC-MS      | HPLC-FLD | GC-MS      | HPLC-FLD |
| NAP | 40     | 80       | n.d.          | 0.10     | 0.066       | 0.22     | n.d.       | n.d.     | 0.25       | 0.50     |
| ACY | n.d.   | n.d.     | n.d.          | n.d.     | n.d.        | n.d.     | n.d.       | n.d.     | n.d.       | n.d.     |
| ACE | n.d.   | 40       | n.d.          | 0.010    | n.d.        | 0.047    | n.d.       | n.d.     | n.d.       | 0.21     |
| FLU | 60     | n.d.     | 0.44          | n.d.     | 0.42        | n.d.     | n.d.       | n.d.     | 1.1        | n.d.     |
| PHE | 80     | 20       | 0.032         | n.d.     | 0.037       | n.d.     | n.d.       | n.d.     | 0.091      | 0.02     |
| ANT | 40     | n.d.     | n.d.          | n.d.     | 1.9         | n.d.     | n.d.       | n.d.     | 9.3        | n.d.     |
| FLT | 40     | n.d.     | n.d.          | n.d.     | 0.81        | n.d.     | n.d.       | n.d.     | 3.9        | n.d.     |
| PYR | 80     | 60       | 1.4           | 5.1      | 1.9         | 5.9      | n.d.       | n.d.     | 6.3        | 18       |
| BaA | 20     | n.d.     | n.d.          | n.d.     | 0.37        | n.d.     | n.d.       | n.d.     | 1.8        | n.d.     |
| CHR | 20     | n.d.     | n.d.          | n.d.     | n.d.        | n.d.     | n.d.       | n.d.     | 6.2        | n.d.     |
| BbF | n.d.   | 20       | n.d.          | n.d.     | n.d.        | 0.86     | n.d.       | n.d.     | n.d.       | 4.3      |
| BkF | n.d.   | 80       | n.d.          | 0.0075   | n.d.        | 0.62     | n.d.       | n.d.     | n.d.       | 3.0      |
| BaP | n.d.   | n.d.     | n.d.          | n.d.     | n.d.        | n.d.     | n.d.       | n.d.     | n.d.       | n.d.     |
| BgP | n.d.   | 80       | n.d.          | 225      | n.d.        | 148      | n.d.       | n.d.     | n.d.       | 277      |
| IND | n.d.   | n.d.     | n.d.          | n.d.     | n.d.        | n.d.     | n.d.       | n.d.     | n.d.       | n.d.     |
| DBA | n.d.   | 20       | n.d.          | n.d.     | n.d.        | 81       | n.d.       | n.d.     | n.d.       | 404      |

**Table S15.** Detected concentrations (µg/g) of 16 PAH compounds in the particulate phase of tunnel wash water samples from 5 different tunnels in Norway (BT = Bjørnegård tunnel, Str = Strindheim tunnel, Sme = Smestad tunnel, Gra = Granfoss tunnel, Gri = Grillstad tunnel). n.a. = not analyzed, n.d. = not detected, and \* indicates values that are false positives.

| PAH       | BT    |          | Str   |          | Sme   |          | Gra   |          | Gri   |          |
|-----------|-------|----------|-------|----------|-------|----------|-------|----------|-------|----------|
|           | GC-MS | HPLC-FLD |
|           | µg/g  | µg/g     |
| NAP       | n.d.  | n.d.     |
| ACY       | n.d.  | n.d.     |
| ACE       | n.d.  | n.d.     |
| FLU       | n.d.  | n.a.     | 1.2   | n.a.     | 0.11  | n.a.     | n.d.  | n.a.     | 0.063 | n.a.     |
| PHE       | n.d.  | n.d.     |
| ANT       | n.d.  | n.d.     | n.d.  | n.d.     | n.d.  | n.d.     | 2.0   | n.d.     | n.d.  | n.d.     |
| FLT       | n.d.  | n.d.     | n.d.  | n.d.     | n.d.  | n.d.     | 0.84  | n.d.     | n.d.  | n.d.     |
| PYR       | 6.6   | 5.3      | n.d.  | n.d.     | n.d.  | 1.5      | 0.30  | n.d.     | 0.16  | 2.0      |
| BaA       | 1.9   | n.d.     | n.d.  | n.d.     | n.d.  | n.d.     | n.d.  | n.d.     | n.d.  | n.d.     |
| CHR       | n.d.  | n.d.     | n.d.  | n.d.     | n.d.  | n.d.     | 1.3   | n.d.     | n.d.  | n.d.     |
| BbF       | n.d.  | 4.5*     | n.d.  | n.d.     | n.d.  | n.d.     | n.d.  | n.d.     | n.d.  | n.d.     |
| BkF       | n.d.  | n.d.     | n.d.  | n.d.     | n.d.  | n.d.     | n.d.  | n.d.     | n.d.  | 0.33     |
| BaP       | n.d.  | n.a.     |
| BgP       | n.d.  | 5.4*     | n.d.  | n.d.     | n.d.  | 68*      | n.d.  | 50*      | n.d.  | 24*      |
| IND       | n.d.  | n.d.     |
| DBA       | n.d.  | n.d.     | n.d.  | n.d.     | n.d.  | n.d.     | n.d.  | n.d.     | n.d.  | 44*      |
| Total PAH | 8.5   | 15       | 1.2   | 0.00     | 0.11  | 70       | 4.5   | 50       | 0.23  | 70       |

**Table S16.** Detected concentrations ( $\mu\text{g/L}$ ) of 16 PAH compounds in the dissolved phase of tunnel wash water samples from 5 different tunnels in Norway (BT = Bjørnegård tunnel, Str = Strindheim tunnel, Sme = Smestad tunnel, Gra = Granfoss tunnel, Gri = Grillstad tunnel). n.a. = not analyzed, n.d. = not detected.

| PAH       | BT              |                 | Str             |                 | Sme             |                 | Gra             |                 | Gri             |                 |
|-----------|-----------------|-----------------|-----------------|-----------------|-----------------|-----------------|-----------------|-----------------|-----------------|-----------------|
|           | GC-MS           | HPLC-FLD        |
|           | $\mu\text{g/L}$ |
| NAP       | 0.25            | 0.50            | n.d.            | 0.031           | n.d.            | 0.10            | 0.074           | 0.47            | n.d.            | n.d.            |
| ACY       | n.d.            |
| ACE       | n.d.            | n.d.            | n.d.            | n.d.            | n.d.            | 0.0098          | n.d.            | 0.21            | n.d.            | 0.012           |
| FLU       | n.d.            | n.a.            |
| PHE       | 0.091           | 0.022           | n.d.            | n.d.            | 0.026           | n.d.            | 0.032           | n.d.            | 0.034           | n.d.            |
| ANT       | n.d.            | n.d.            | 0.12            | n.d.            |
| FLT       | 0.15            | n.d.            | n.d.            | n.d.            | n.d.            | n.d.            | 0.0068          | n.d.            | n.d.            | n.d.            |
| PYR       | 0.030           | n.d.            | n.d.            | n.d.            | 0.088           | n.d.            | n.d.            | n.d.            | n.d.            | n.d.            |
| BaA       | n.d.            |
| CHR       | n.d.            |
| BbF       | n.d.            |
| BkF       | n.d.            | n.d.            | n.d.            | 0.0069          | n.d.            | 0.038           | n.d.            | 0.0075          | n.d.            | 0.0097          |
| BaP       | n.d.            | n.a.            |
| BgP       | n.d.            |
| IND       | n.d.            |
| DBA       | n.d.            |
| Total PAH | 0.52            | 0.52            | 0.12            | 0.038           | 0.11            | 0.15            | 0.11            | 0.69            | 0.034           | 0.022           |

**Table S17.** Summary of PAH concentrations detected in tunnel wash water samples in other studies. PF = particle fraction suspended in water, SF= sediment fraction, DF = dissolved fraction. n.d. = not detected, n.a. = not analyzed.

|           | Nordby [4]             | Granfoss [4]           | Vassum [5]             | Hanekleiv [6]          |
|-----------|------------------------|------------------------|------------------------|------------------------|
| Fraction  | PF ( $\mu\text{g/g}$ ) | PF ( $\mu\text{g/g}$ ) | SF ( $\mu\text{g/g}$ ) | DF ( $\mu\text{g/L}$ ) |
| NAP       | 0.14                   | 0.099                  | n.d.                   | 1.15                   |
| ACY       | 0.057                  | 0.048                  | n.d.                   | 0.06                   |
| ACE       | 0.021                  | 0.02                   | n.d.                   | n.a.                   |
| FLU       | 0.074                  | 0.068                  | 0.216                  | 0.07                   |
| PHE       | 1.0                    | 0.76                   | 0.602                  | 0.17                   |
| ANT       | 0.096                  | 0.076                  | 0.119                  | n.a.                   |
| FLT       | 1.1                    | 0.95                   | 0.386                  | 0.37                   |
| PYR       | 2.0                    | 1.9                    | 0.648                  | 0.61                   |
| BaA       | 0.14                   | 0.11                   | 0.075                  | n.a.                   |
| CHR       | 0.28                   | 0.2                    | 0.374                  | n.a.                   |
| BbF       | 0.4                    | 0.3                    | 0.153                  | n.a.                   |
| BkF       | 0.057                  | 0.043                  | 0.075                  | n.a.                   |
| BaP       | 0.15                   | 0.16                   | 0.081                  | 0.36                   |
| BgP       | 0.93                   | 0.66                   | 0.237                  | n.a.                   |
| IND       | 0.17                   | 0.13                   | 0.08                   | 0.08                   |
| DBA       | 0.074                  | 0.064                  | n.d.                   | n.a.                   |
| Total PAH | 6.689                  | 5.588                  | 3.05                   | 2.86                   |

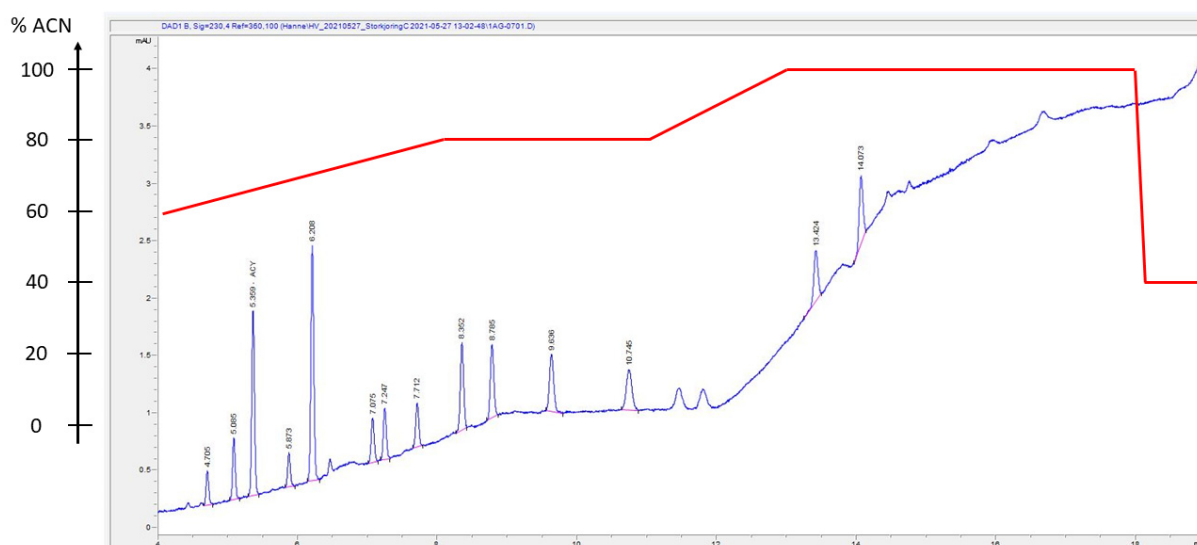

**Figure S1.** HPLC-DAD chromatogram presenting the elution order of the target analyte ACY (peak eluting as number three from the left). The sample was a calibration standard sample with a concentration of 100 µg/L of each PAH target analyte.

#### References:

1. Budzinski, H.; Jones, I.; Bellocq, J.; Piérard, C.; Garrigues, P. Evaluation of Sediment Contamination by Polycyclic Aromatic Hydrocarbons in the Gironde Estuary. *Mar. Chem.* **1997**, *58*, 85–97. [https://doi.org/10.1016/S0304-4203\(97\)00028-5](https://doi.org/10.1016/S0304-4203(97)00028-5).
2. Emsbo-Mattingly, S.; Litman, E. Chapter 34—Forensic Identification of Historical and Ongoing Tar Oil Releases in Nearshore Environments. In *Oil Spill Environmental Forensics Case Studies*; Stout, S.A., Wang, Z., Eds.; Butterworth-Heinemann: 2018, Rockland, MA, USA; pp. 785–826. <https://doi.org/10.1016/B978-0-12-804434-6.00034-3>.
3. Yunker, M.B.; Macdonald, R.W.; Vingarzan, R.; Mitchell, R.H.; Goyette, D.; Sylvestre, S. PAHs in the Fraser River Basin: A Critical Appraisal of PAH Ratios as Indicators of PAH Source and Composition. *Org. Geochem.* **2002**, *33*, 489–515. [https://doi.org/10.1016/S0146-6380\(02\)00002-5](https://doi.org/10.1016/S0146-6380(02)00002-5).
4. Allan, I.J.; O'Connell, S.G.; Meland, S.; Bæk, K.; Grung, M.; Anderson, K.A.; Rannekleiv, S.B. PAH Accessibility in Particulate Matter from Road-Impacted Environments. *Environ. Sci. Technol.* **2016**, *50*, 7964–7972. <https://doi.org/10.1021/acs.est.6b00504>.
5. Meland, S. *Chemical Characterisation of Sediment from Vassum Sedimentation Basin*; NPRA Reports; 94; Norwegian Public Roads Administration, 2012, Oslo, Norway; pp. 1–22.
6. Paruch, A.M.; Roseth, R. Treatment of Tunnel Wash Water—Experiments with Organic Sorbent Materials. Part II: Removal of Toxic Metals. *J. Environ. Sci.* **2008**, *20*, 1042–1045. [https://doi.org/10.1016/S1001-0742\(08\)62147-6](https://doi.org/10.1016/S1001-0742(08)62147-6).
